# Supplementary material for: Plasmodium falciparum infection in humans and mosquitoes influence natural Anopheline biting behavior and transmission
Source: PubMed Central journal article supplement (PMC11139876; doi:10.1038/s41467-024-49080-9), 2024-05-30
Supplement: 41467_2024_49080_MOESM3_ESM.pdf [file 41467_2024_49080_MOESM3_ESM.pdf]

## **Description of Additional Supplementary Files**

File Name: Supplementary Data 1

Description: Primer sequences for all molecular assays
